# Supplementary material for: Incident diabetes mellitus may explain the association between sleep duration and incident coronary heart disease
Source: Springer Nature journal article supplement (doi:10.1007/s00125-017-4464-3), 2017-11-04
Supplement: MOESM1 [file 15191948]

Sleep duration, diabetes and CHD  
Svensson et al.

**ESM Table 1** Hazard ratios and confidence intervals for incident coronary heart disease occurring before incident diabetes mellitus (non-diabetes CHD) according to sleep duration for men and women respectively.

| Incident non-diabetes CHD | Men (n=6966)       |               |            |              |               | Women (n=9378)     |              |            |              |              |
|---------------------------|--------------------|---------------|------------|--------------|---------------|--------------------|--------------|------------|--------------|--------------|
|                           | Sleep duration (h) |               |            |              |               | Sleep duration (h) |              |            |              |              |
|                           | <6                 | 6-7           | 7-8        | 8-9          | ≥9            | <6                 | 6-7          | 7-8        | 8-9          | ≥9           |
| Person-years              | 4053               | 20,827        | 43,710     | 26,510       | 3760          | 6909               | 28,519       | 61,436     | 44,853       | 6368         |
| No. (events)              | 305 (53)           | 1484 (218)    | 2988 (392) | 1897 (298)   | 292 (55)      | 460 (31)           | 1819 (100)   | 3835 (181) | 2843 (158)   | 421 (31)     |
| Model 1, HR               | 1.39               | 1.18          | Reference  | 1.11         | 1.33          | 1.32               | 1.11         | Reference  | 1.04         | 1.34         |
| (95% CI)                  | (1.05, 1.86)*      | (1.00, 1.40)* |            | (0.95, 1.29) | (1.00, 1.77)* | (0.90, 1.94)       | (0.87, 1.41) |            | (0.84, 1.29) | (0.91, 1.97) |
| Model 2, HR               | 1.23               | 1.13          | Reference  | 1.07         | 1.13          | 1.24               | 1.05         | Reference  | 1.03         | 1.28         |
| (95% CI)                  | (0.91, 1.66)       | (0.95, 1.33)  |            | (0.92, 1.25) | (0.84, 1.50)  | (0.83, 1.84)       | (0.82, 1.35) |            | (0.83, 1.28) | (0.87, 1.88) |
| Model 3, HR               | 1.35               | 1.15          | Reference  | 1.13         | 1.33          | 1.29               | 1.04         | Reference  | 0.98         | 1.34         |
| (95% CI)                  | (0.98, 1.87)       | (0.96, 1.38)  |            | (0.95, 1.33) | (0.98, 1.80)  | (0.86, 1.93)       | (0.80, 1.35) |            | (0.78, 1.23) | (0.90, 1.98) |

Model 1 was adjusted for age and socioeconomic index

Model 2 was stratified by BMI category and adjusted for age, socioeconomic index, marital status, smoking, alcohol intake, physical activity, hypertension, use of lipid-lowering medication, shift work, psychological stress and sleep quality

Model 3 additionally excluded the first 3 years of follow-up

\* $p < 0.05$  vs reference

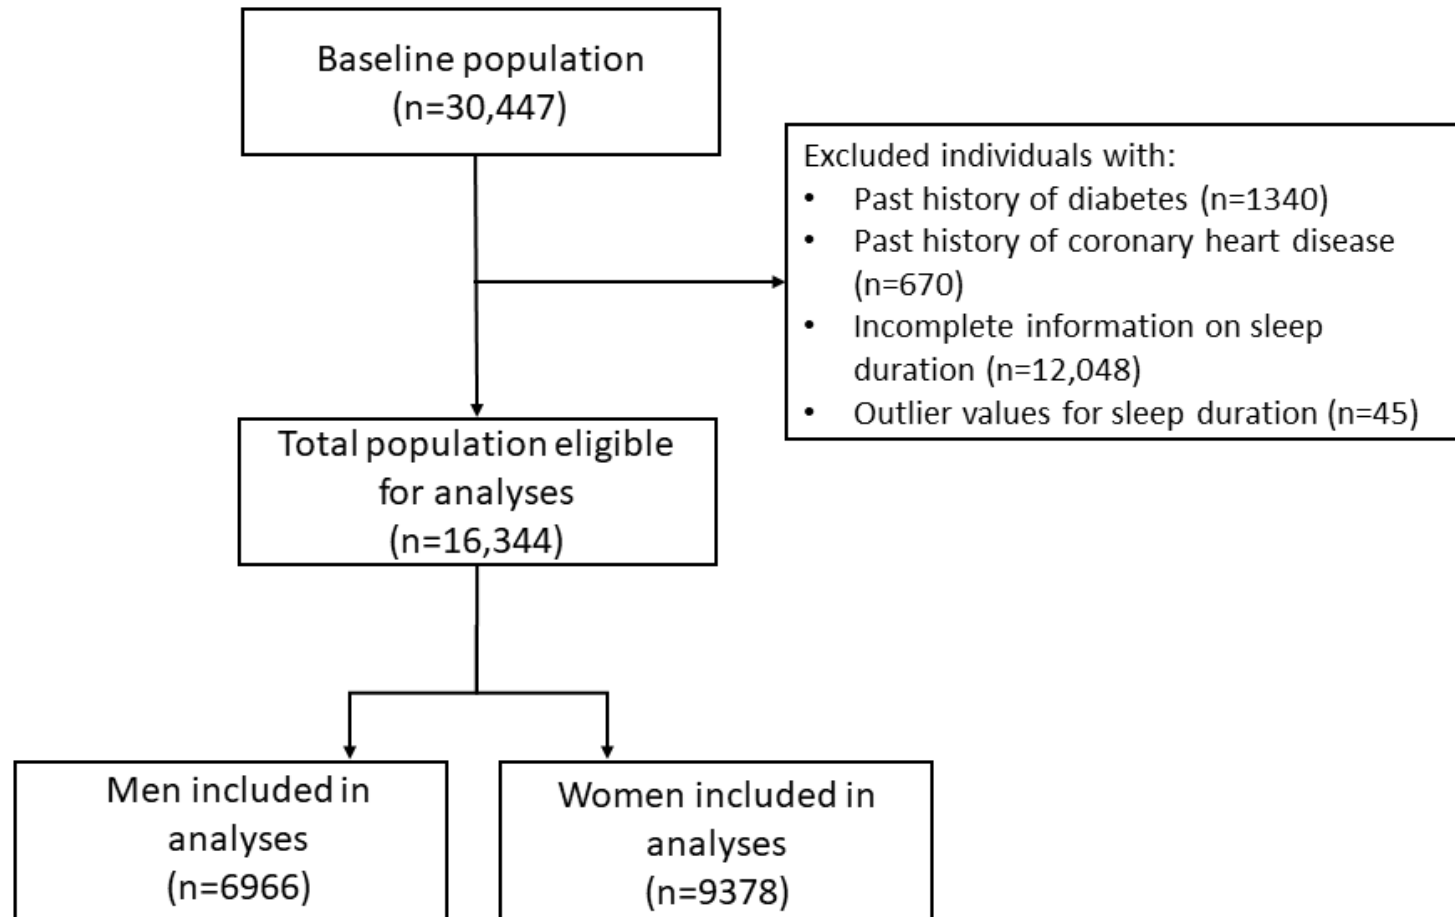

**ESM Fig. 1.** Flow-chart of the inclusion and exclusion of study participants.
